# Supplementary material for: Pattern of Adiponectin, Osteocalcin, Irisin, FGF-21, and MCP-1 According to the Body Size Phenotype: Could They Be Markers of Metabolic Health in Mexican-Mestizo Middle-Aged Women?
Source: MDPI journal article supplement (doi:10.3390/metabo11110771), 2021-11-11
Supplement: s1 [file s1]

Fig. S1

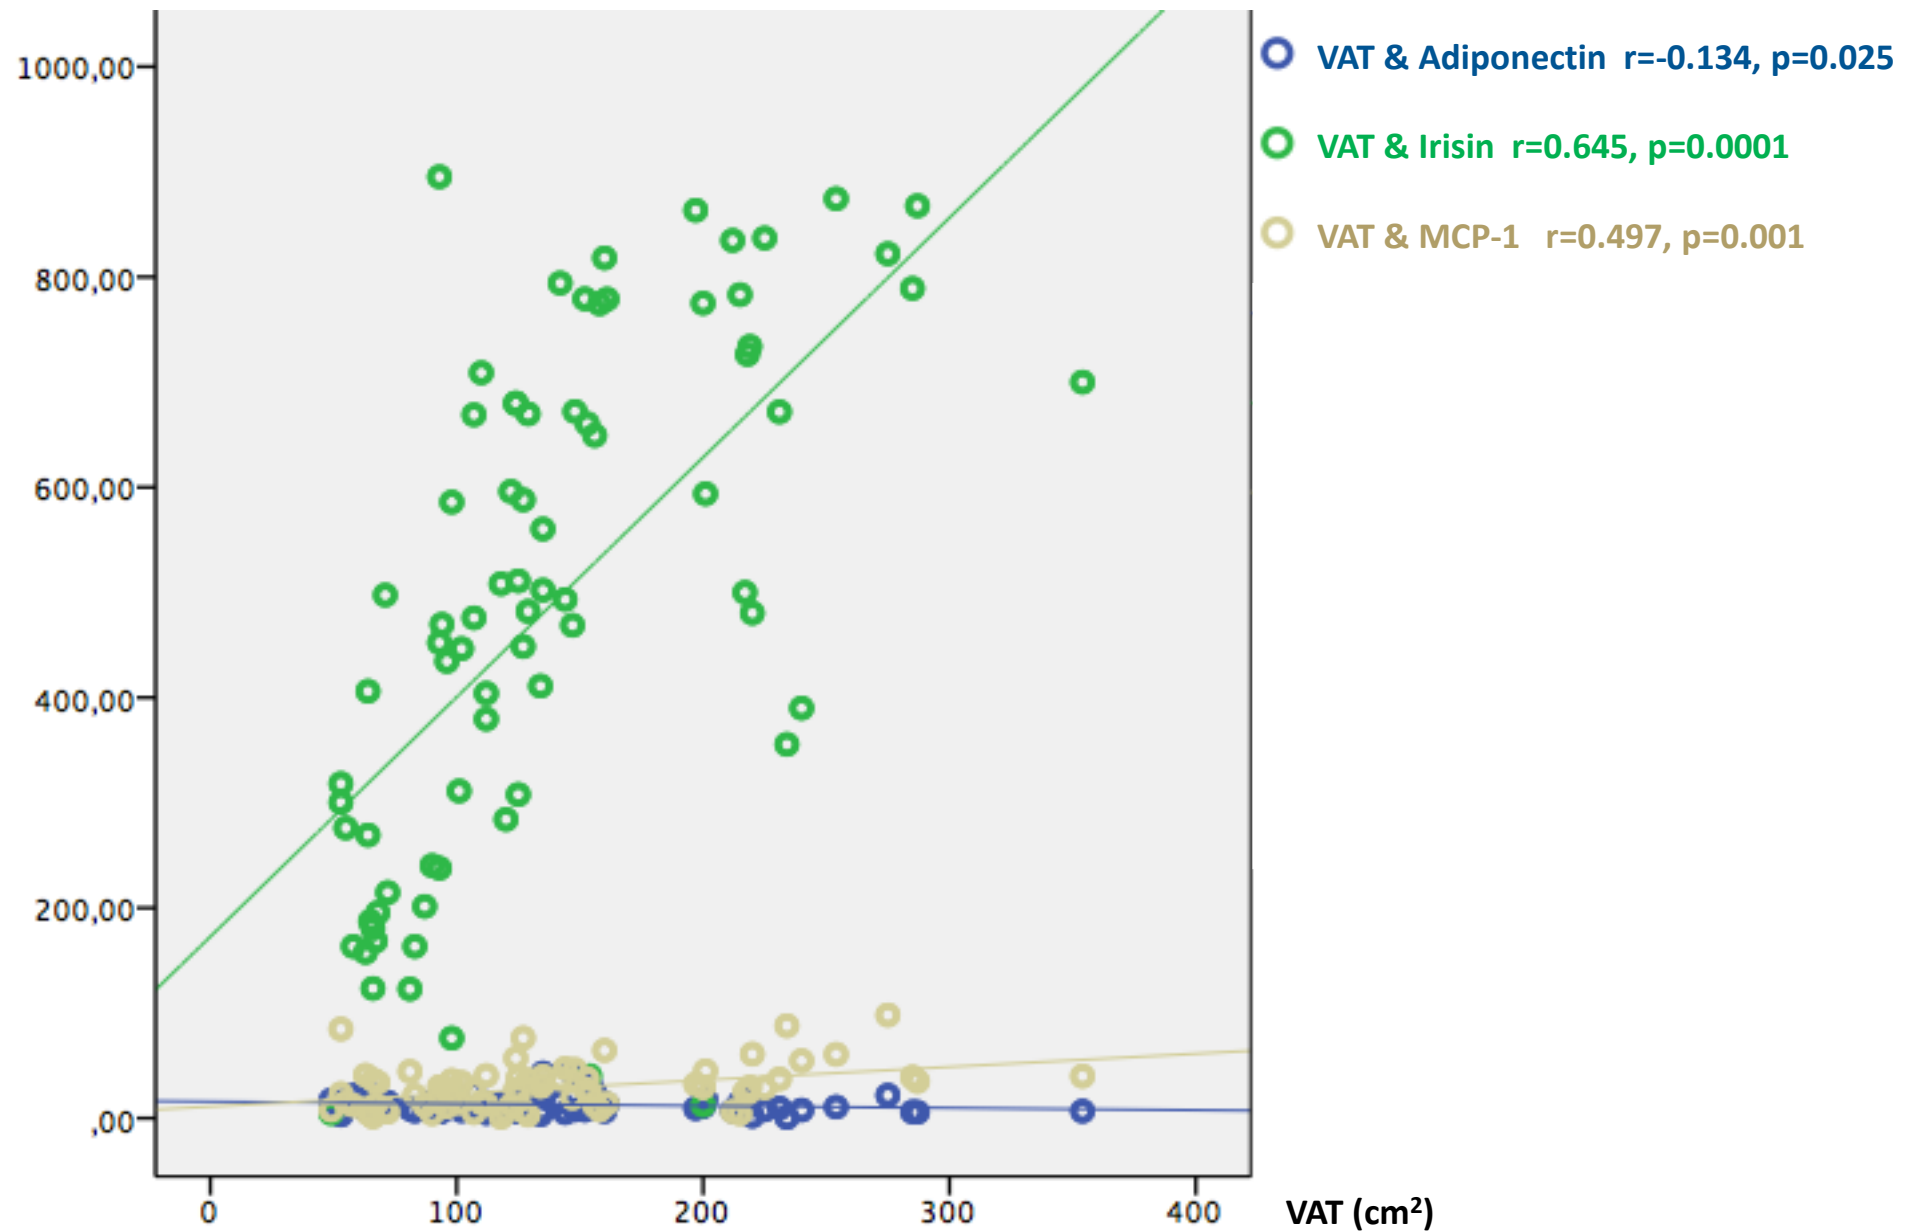

**Figure S1. Correlation between adiponectin, irisin, MCP-1 levels and VAT.**

MCP-1: monocyte chemoattractant protein-1 , VAT: visceral adipose tissue.

Fig. S2

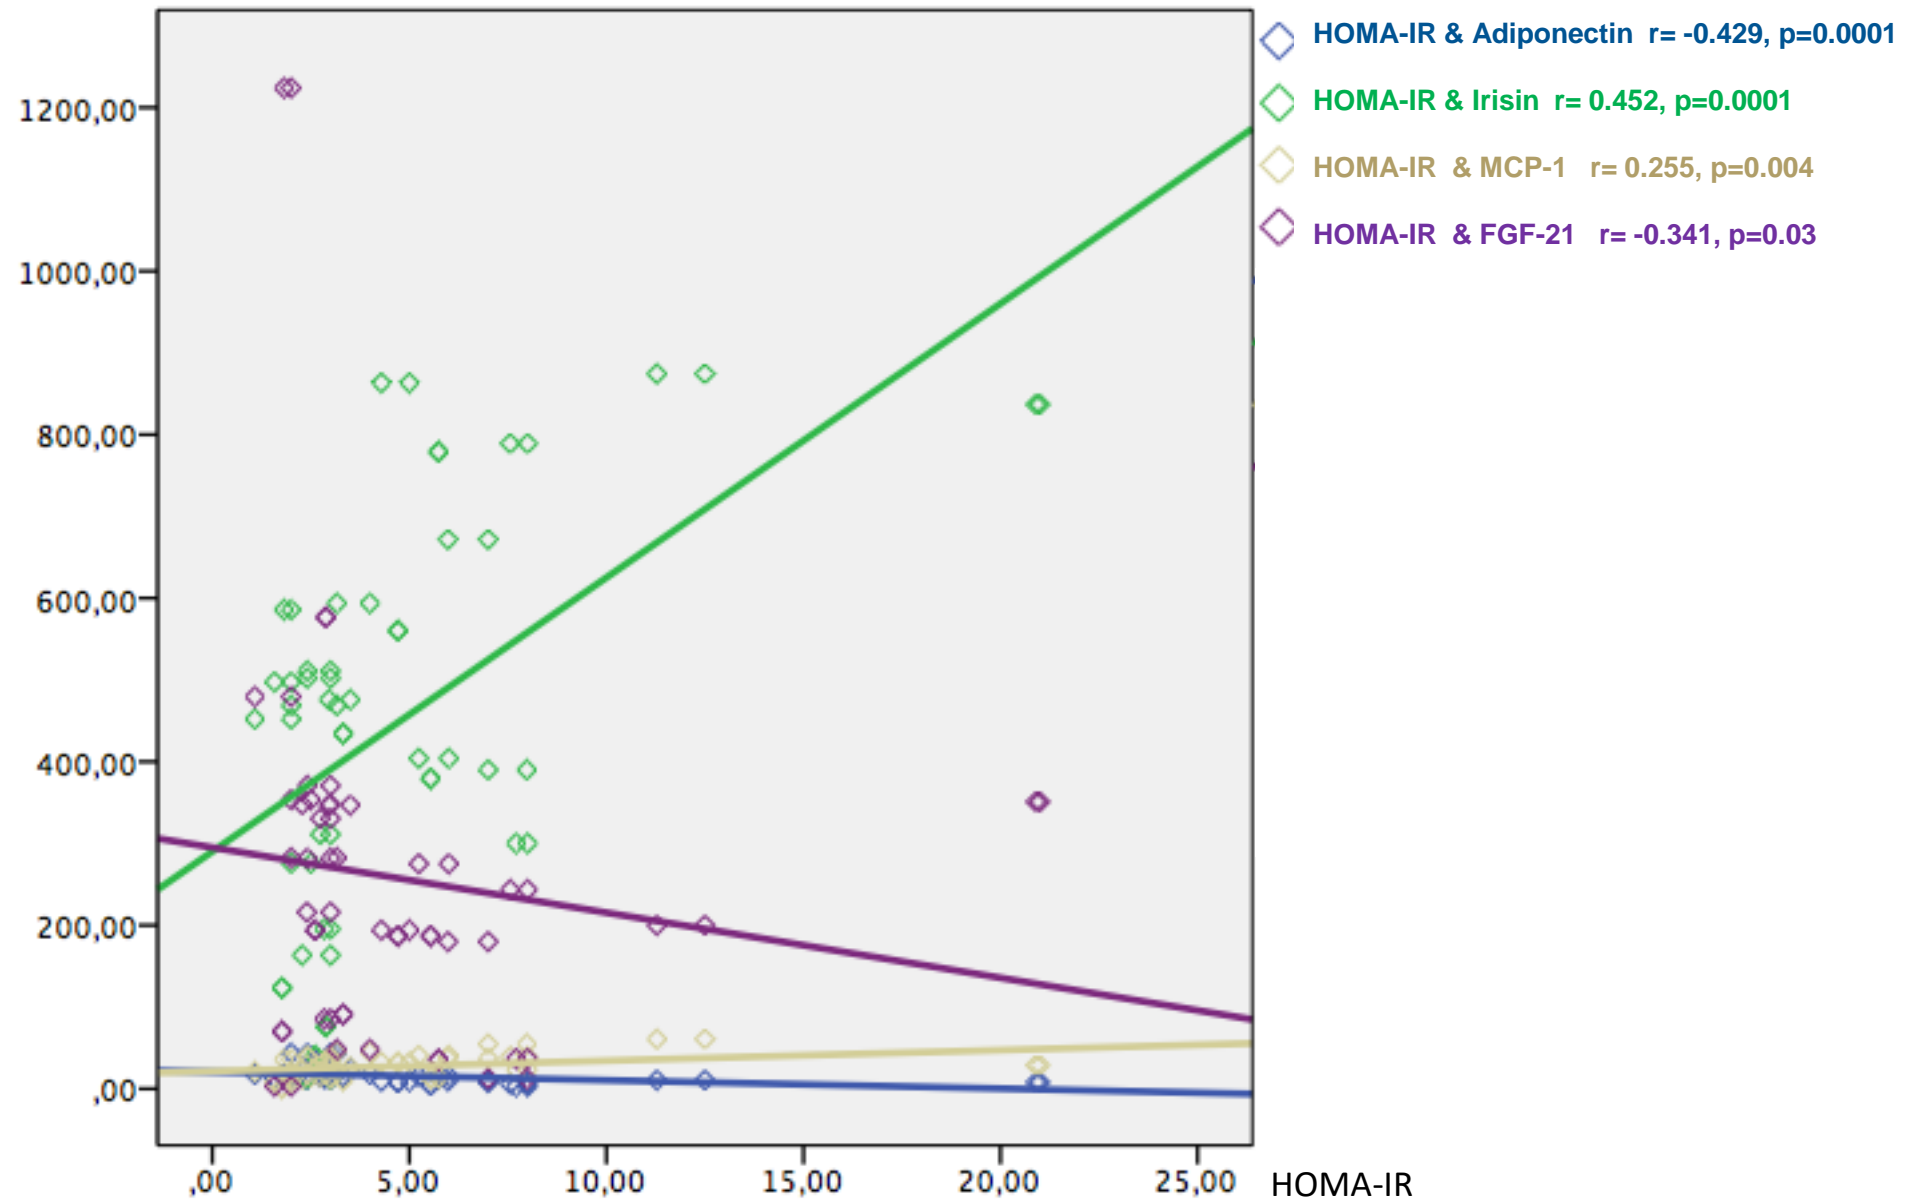

**Figure S2. Correlation between adiponectin, irisin, MCP-1, FGF-21 levels and HOMAR-IR.**

MCP-1: monocyte chemoattractant protein-1, , FGF-21: fibroblast growth factor-21.

Fig. S3

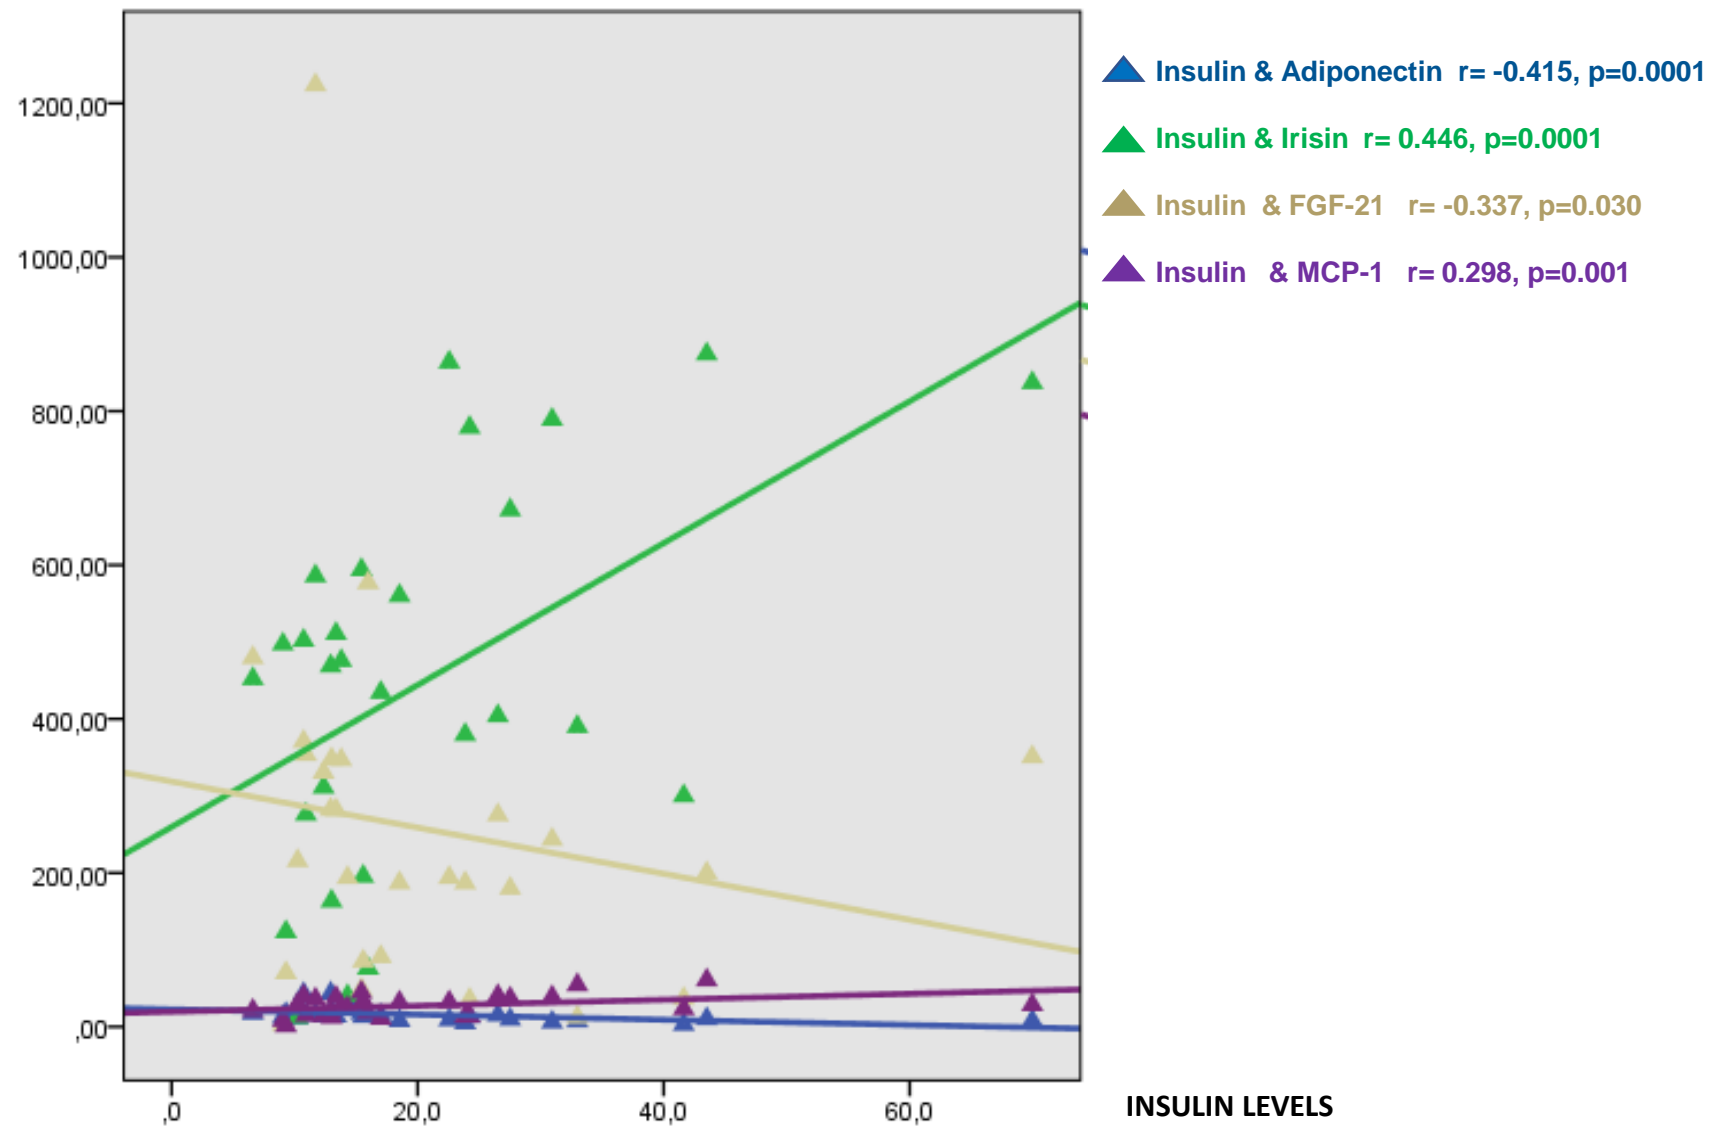

**Figure S3. Correlation between adiponectin, irisin, MCP-1, FGF-21 and insulin levels.**

MCP-1: monocyte chemoattractant protein-1, FGF-21: fibroblast growth factor-21.

Fig. S4

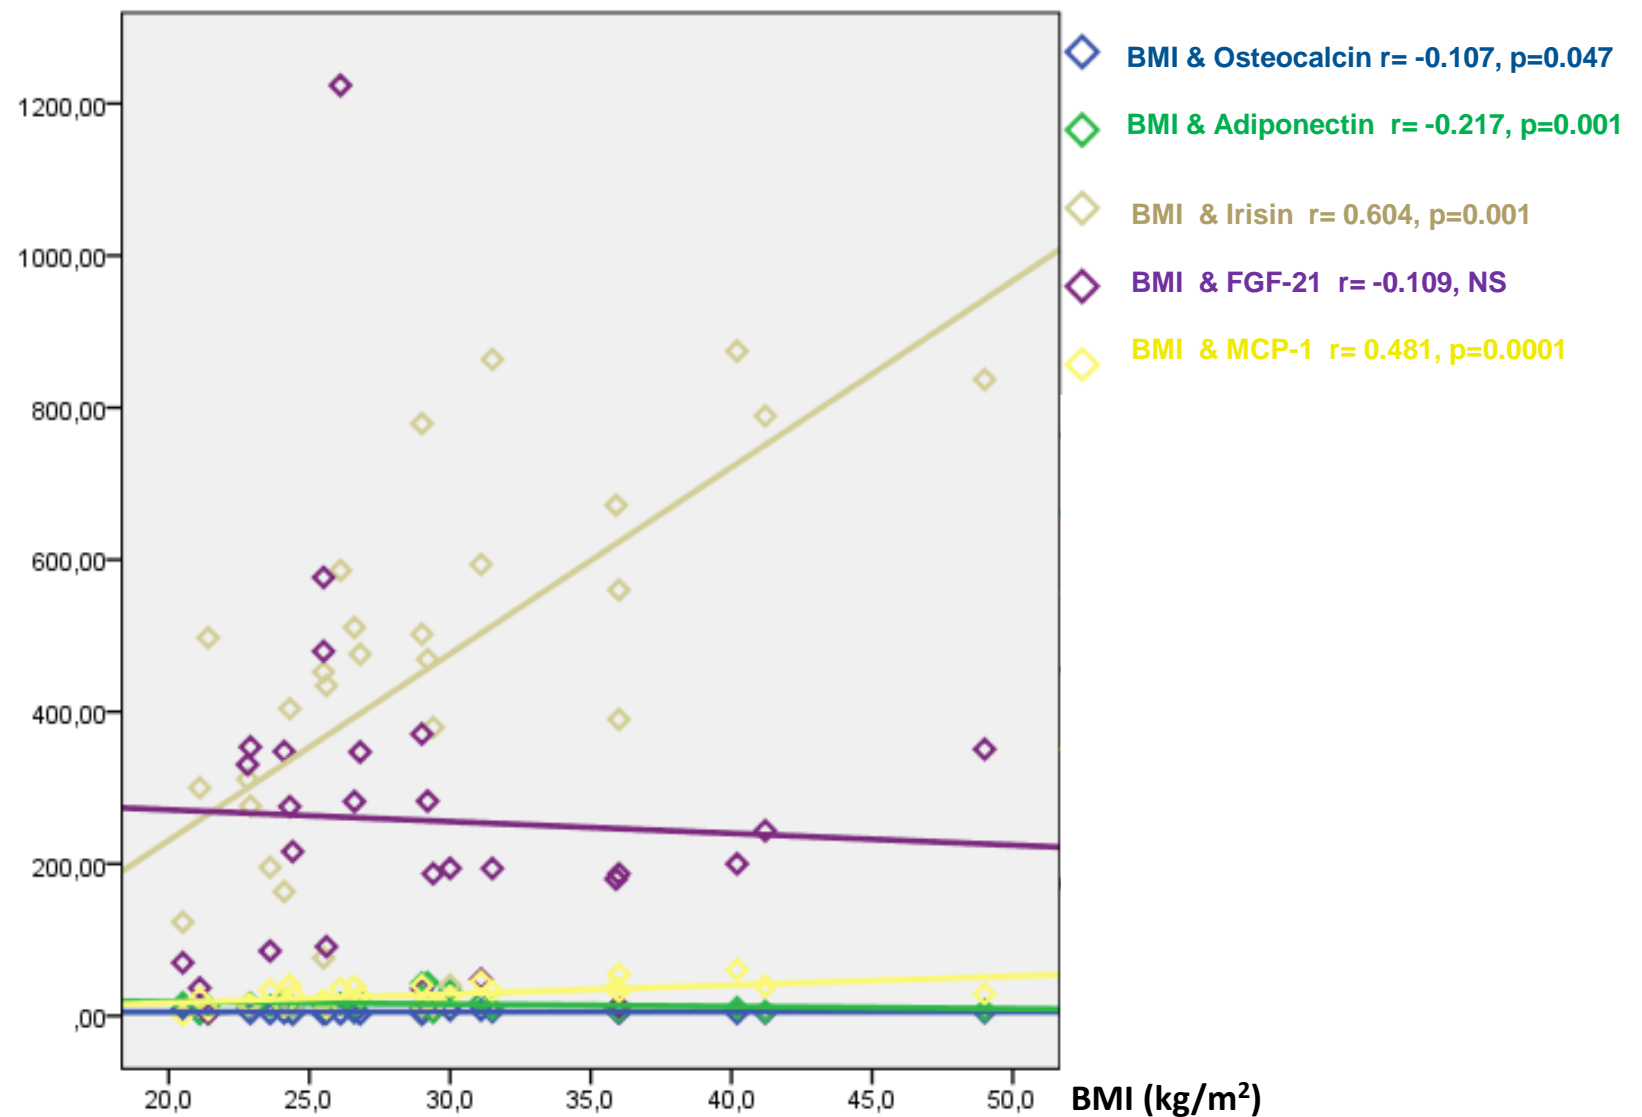

**Figure S4. Correlation between osteocalcin, adiponectin, irisin, FGF-21, MCP-1 levels and BMI.**

MCP-1: monocyte chemoattractant protein-1, FGF-21: fibroblast growth factor-21, BMI: body mass index.
